# Supplementary material for: Results from Genetic Studies in Patients Affected with Craniosynostosis: Clinical and Molecular Aspects
Source: PubMed Central journal article supplement (PMC9112228; doi:10.3389/fmolb.2022.865494), 2022-04-28
Supplement: Table1.pdf [file Table1.pdf]

Supplementary Table 1 List of primers used for PCR followed by Sanger sequencing

| Gene                                          | Exon/ variant           | Forward primer sequence 5'-3'                   | Reverse primer sequence 5'-3'                     |
|-----------------------------------------------|-------------------------|-------------------------------------------------|---------------------------------------------------|
| <b>Confirmation studies in Tier 1</b>         |                         |                                                 |                                                   |
| <i>FGFR1</i>                                  | 5                       | GGGAGGTTTACAACCCATCA                            | TCGATGTGCTTTAGCCACTG                              |
| <i>FGFR2</i>                                  | 7                       | GGTCTCTCATTCTCCATCCC                            | CCAACAGGAAATCAAAGAACC                             |
| <i>FGFR2</i>                                  | 8                       | <i>tgtaaaacgacggccagt</i> CCTCCACAATCATTCTGTGTC | <i>caggaaacagctatgacc</i> ATAGCAGTCAACCAAGAAAAGGG |
| <i>FGFR3</i>                                  | 7                       | GCGTCGTGGAGAACAAGTTT                            | GTGCTTGAGCCACTGGATGT                              |
| <i>TWIST1</i>                                 | 1                       | GAGGCGCCCCGCTCTTCTCC                            | AGCTCCTCGTAAGACTGCGGAC                            |
| <i>TWIST1</i>                                 | 2                       | CAAGAAGTCTGCGGGCTGTG                            | AATCGAGGTGGACTGGGAACCG                            |
| <b>Confirmation studies in Tier 2 &amp; 3</b> |                         |                                                 |                                                   |
| <i>ALX3</i>                                   | c.578_581del            | CCTCCCTTTTGTGTTCTCCA                            | ACTTCACCGCTTCCAAAATG                              |
| <i>ARID1A</i>                                 | c.791C>A                | ACAACATGGCGGACAACAAA                            | GACGTGAGCAGTTGGTTGAG                              |
| <i>EFTUD2</i>                                 | c.491A>G                | TTTCATTTCTGAGGGATGC                             | AGGGTGAAGGAAGGAGGAGA                              |
| <i>ERF</i>                                    | c.394C>T                | ATTCATTGATGTGGGGTTGG                            | GCAGGTACCGTTTCATGTCC                              |
| <i>FAM111A</i>                                | c.913A>G                | CATATTTGGCAGGCAGGACA                            | GTCTCCCACAATGCTATCT                               |
| <i>KMT2A</i>                                  | c.93_163del             | ACTTCACGGGGCGAACATG                             | GATGCTCCTCAATCCCGGAT                              |
| <i>KMT2D</i>                                  | c.13663_13671del        | GGTTGGTGAGCTCCGAAA                              | CACTCTACGTCAGCAATTCCC                             |
| <i>MN1</i>                                    | c.3883C>T               | GGACGGTGCCTGTCTTGAT                             | TCAGCAATAGTGGCCCTTTC                              |
| <i>NSD1</i>                                   | c.2954_2955del          | AGGAGCAGCGGTTGATGAC                             | CATTCTCACTGTTTCATTACAGA                           |
| <i>NSD1</i>                                   | c.5332C>T               | TGTGGACAGACAGACATTGC                            | TCTGAGCCTCTGTCTAGCAA                              |
| <i>RECQL4</i>                                 | c.308C>T                | CTCCTCCCCTTCCCTGTTT                             | AGTCCCCACGCTCAATTGTA                              |
| <i>RECQL4</i>                                 | c.3062G>A               | CCTGCCTGCATCTGACATG                             | GGAGGAGCCTGTCAGAGC                                |
| <i>TCF12</i>                                  | c.356T>C                | TCCTGCCCAGAATTTGACTC                            | GCCTGGTAAACTGGGGAAC                               |
| <i>TCF12</i>                                  | c.679del                | GAGGTTTGTGTTTGGTAAGCC                           | TCAGCAATAAACACCACTGGA                             |
| <i>TCF12</i>                                  | c.932C>G                | ACACGTGACTAGGGTACAGC                            | ATCACCTCCTCAACCTTGA                               |
| <i>TCF12</i>                                  | c.2015_2016ins          | CTGGAGGCTCAGTTCAATGC                            | ACCTTTACAATGGCCACTGC                              |
| <i>ZIC1</i>                                   | c.1172C>A;<br>c.1210T>C | GAGGCGAGTATGAGCAAAGG                            | TTTGATTTCGAGGGTTCTTT                              |
