# Supplementary material for: Results from Genetic Studies in Patients Affected with Craniosynostosis: Clinical and Molecular Aspects
Source: PubMed Central journal article supplement (PMC9112228; doi:10.3389/fmolb.2022.865494), 2022-04-28
Supplement: Table4.pdf [file Table4.pdf]

**Supplementary Table 4** Summary of genetic diagnosis obtained in a cohort of 166 patients affected with syndromic craniosynostosis (only patients with positive results of genetic testing were calculated)

|                                                 | <i>FGFR1</i> |               | <i>FGFR2</i> |               | <i>FGFR3</i> |               | <i>TWIST1</i> |               | <i>Total</i> |               | <i>Another</i> |               | <i>Total</i> |               |
|-------------------------------------------------|--------------|---------------|--------------|---------------|--------------|---------------|---------------|---------------|--------------|---------------|----------------|---------------|--------------|---------------|
|                                                 | Patients     | Frequency (%) | Patients     | Frequency (%) | Patients     | Frequency (%) | Patients      | Frequency (%) | Patients     | Frequency (%) | Patients       | Frequency (%) | Patients     | Frequency (%) |
| <b>Sex</b>                                      |              |               |              |               |              |               |               |               |              |               |                |               |              |               |
| Female                                          | 2            | 3             | 13           | 19            | 10           | 14            | 9             | 13            | 34           | 48            | 10             | 14            | 44           | 62            |
| Male                                            | 1            | 1             | 6            | 9             | 3            | 4             | 8             | 12            | 18           | 25            | 9              | 13            | 27           | 38            |
| Total                                           | 3            | 4             | 19           | 27            | 13           | 18            | 17            | 24            | 52           | 73            | 19             | 27            | 71           | 100           |
| <b>Presence of additional clinical features</b> |              |               |              |               |              |               |               |               |              |               |                |               |              |               |
| Isolated                                        | 0            | 0             | 4            | 8             | 8            | 16            | 8             | 16            | 20           | 39            | 5              | 10            | 25           | 49            |
| Syndromic                                       | 0            | 0             | 6            | 12            | 1            | 2             | 5             | 10            | 12           | 24            | 14             | 27            | 26           | 51            |
| Total                                           | 0            | 0             | 10           | 20            | 9            | 18            | 13            | 25            | 32           | 63            | 19             | 37            | 51           | 100           |
| <b>Number of affected sutures</b>               |              |               |              |               |              |               |               |               |              |               |                |               |              |               |
| Multiple                                        | 0            | 0             | 8            | 16            | 5            | 10            | 7             | 14            | 20           | 41            | 12             | 24            | 32           | 65            |
| Single                                          | 0            | 0             | 1            | 2             | 4            | 8             | 5             | 10            | 10           | 20            | 7              | 14            | 17           | 35            |
| Total                                           | 0            | 0             | 9            | 18            | 9            | 18            | 12            | 24            | 30           | 61            | 19             | 39            | 49           | 100           |
| <b>Occurrence</b>                               |              |               |              |               |              |               |               |               |              |               |                |               |              |               |
| Familial                                        | 3            | 4             | 2            | 3             | 3            | 4             | 9             | 13            | 17           | 24            | 2              | 3             | 19           | 27            |
| Sporadic                                        | 0            | 0             | 17           | 24            | 10           | 14            | 8             | 11            | 35           | 49            | 17             | 24            | 52           | 73            |
| Total                                           | 3            | 4             | 19           | 27            | 13           | 18            | 17            | 24            | 52           | 73            | 19             | 27            | 71           | 100           |
